# Supplementary material for: Exported Epoxide Hydrolases Modulate Erythrocyte Vasoactive Lipids during Plasmodium falciparum Infection
Source: PubMed Central journal article supplement (PMC5082902; doi:10.1128/mbio.01538-16), 2016-10-18
Supplement: mbo005163038st1.pdf [file mbo005163038st1.pdf]

**Table 1:** InterPro domain information for the top five non-Apicomplexan hits from a PSI-Blast pseudo-multiple sequence alignment (comparing the Pf  $\alpha/\beta$ -hydrolase sequence to a non-redundant protein databank) generated using Phyre2 (7).

| Input        | E-value | Organism and gene ID (UniRef50 accession number)                                                    | IPRO29058 ( $\alpha/\beta$ -hydrolase) | IPRO00639 (Epoxy_hydrolase_like) | IPRO22742 (Lysophospholipase_put/serine aminopeptidase) |
|--------------|---------|-----------------------------------------------------------------------------------------------------|----------------------------------------|----------------------------------|---------------------------------------------------------|
| <b>PfEH1</b> | 6.0E-62 | <i>Desulfatibacillum alkenivorans</i> (Proteobacteria) $\alpha/\beta$ -hydrolase (B8FAJ5)           | ✓                                      | ✓                                | ✗                                                       |
|              | 5.0E-60 | <i>Nostoc punctiforme</i> (Cyanobacteria) $\alpha/\beta$ -hydrolase (B2IZH4)                        | ✓                                      | ✓                                | ✗                                                       |
|              | 4.0E-59 | <i>Carnobacterium</i> sp. AT7 (Firmicutes) Uncharacterized protein (A8UAB3)                         | ✓                                      | ✓                                | ✗                                                       |
|              | 7.0E-59 | <i>Alpha proteobacterium</i> (Proteobacteria) putative 3-oxoadipate enol-lactonase (A8TT96)         | ✓                                      | ✗                                | ✗                                                       |
|              | 8.0E-59 | <i>Pseudoalteromonas atlantica</i> (strain T6c) (Proteobacteria) $\alpha/\beta$ -hydrolase (Q15ZT2) | ✓                                      | ✓                                | ✗                                                       |
| <b>PfEH2</b> | 1.0E-70 | <i>Homo sapiens</i> (Human) Soluble bifunctional epoxide hydrolase EPHX2 (P34913)                   | ✓                                      | ✓                                | ✗                                                       |
|              | 1.0E-68 | <i>Sus scrofa</i> (Pig) Soluble bifunctional epoxide hydrolase EPHX2 (Q6Q2C2)                       | ✓                                      | ✓                                | ✗                                                       |
|              | 9.0E-65 | <i>Parvibaculum lavamentivorans</i> (Proteobacterium) $\alpha/\beta$ -hydrolase (A7HW23)            | ✓                                      | ✓                                | ✗                                                       |
|              | 3.0E-63 | <i>Salmo salar</i> (Atlantic salmon) Epoxide hydrolase 2 (P34914)                                   | ✓                                      | ✓                                | ✗                                                       |
|              | 5.0E-62 | <i>Nostoc punctiforme</i> (Cyanobacteria) $\alpha/\beta$ -hydrolase (B2IV02)                        | ✓                                      | ✓                                | ✗                                                       |
| <b>PfXL1</b> | 1.0E-57 | <i>Salinibacter ruber</i> (Bacteroidetes) Lysophospholipase (Q2S1I8)                                | ✓                                      | ✗                                | ✓                                                       |
|              | 2.0E-57 | <i>Herpetosiphon aurantiacus</i> (Chloroflexi) $\alpha/\beta$ -hydrolase (A9B3M2)                   | ✓                                      | ✗                                | ✓                                                       |
|              | 2.0E-57 | <i>Chlamydomonas reinhardtii</i> (green algae) Predicted protein (A8IJR0)                           | ✓                                      | ✗                                | ✗                                                       |
|              | 1.0E-55 | <i>Oryza sativa subsp. japonica</i> (rice) (Q0J1Y4)                                                 | ✓                                      | ✗                                | ✓                                                       |
|              | 6.0E-55 | <i>Desulfococcus oleovorans</i> (Proteobacteria) $\alpha/\beta$ -hydrolase (A8ZXX5)                 | ✓                                      | ✗                                | ✓                                                       |
| <b>PfXL2</b> | 3.0E-55 | <i>Salinibacter ruber</i> (Bacteroidetes) Lysophospholipase (Q2S1I8)                                | ✓                                      | ✗                                | ✓                                                       |
|              | 8.0E-54 | <i>Geodermatophilus obscurus</i> (Actinobacteria) $\alpha/\beta$ -hydrolase (D2S453)                | ✓                                      | ✗                                | ✗                                                       |
|              | 1.0E-53 | <i>Oryza sativa subsp. japonica</i> (rice) Lysophospholipase (Q8H4S9)                               | ✓                                      | ✗                                | ✗                                                       |
|              | 4.0E-53 | <i>Gordonia bronchialis</i> (Actinobacteria) Acylglycerol lipase (D0L785)                           | ✓                                      | ✗                                | ✗                                                       |
|              | 6.0E-52 | <i>Herpetosiphon aurantiacus</i> (Chloroflexi) $\alpha/\beta$ -hydrolase (A9B3M2)                   | ✓                                      | ✗                                | ✓                                                       |
