# Supplementary material for: Exported Epoxide Hydrolases Modulate Erythrocyte Vasoactive Lipids during Plasmodium falciparum Infection
Source: PubMed Central journal article supplement (PMC5082902; doi:10.1128/mbio.01538-16), 2016-10-18
Supplement: mbo005163038st2.pdf [file mbo005163038st2.pdf]

**Supplemental Table 2:** Putative interacting partners of PfEH1 and PfEH2 identified using mass-spectrometry. GFP-tagged proteins were immunoprecipitated (using anti-GFP polyclonal antibody) from PfEH1-, PfEH2-, PfXL1-, PfXL2- GFP tagged cultures, or the 3D7 parent line and the resulting proteins analysed by mass spectrometry. Values are the number of unique peptide hits. The peptide counts for spectrin are bolded. ND = no peptides detected.

|                             | <b>3D7 parent</b> | <b>PfEH1-GFP<br/>(clone 3H)</b> | <b>PfEH2-GFP<br/>(clone 2B)</b> | <b>PfXL1-GFP<br/>(TEOE pool)</b> | <b>PfXL2-GFP<br/>(TEOE pool)</b> |
|-----------------------------|-------------------|---------------------------------|---------------------------------|----------------------------------|----------------------------------|
| Bait                        | ND                | 14                              | 21                              | 21                               | 53                               |
| Human proteins              |                   |                                 |                                 |                                  |                                  |
| α-spectrin                  | <b>5</b>          | <b>75</b>                       | <b>97</b>                       | <b>7</b>                         | <b>22</b>                        |
| β-spectrin                  | <b>5</b>          | <b>65</b>                       | <b>83</b>                       | <b>2</b>                         | <b>11</b>                        |
| ankyrin                     | 7                 | 38                              | 46                              | 8                                | 21                               |
| Solute carrier family 4 AE1 | 8                 | 16                              | 17                              | 15                               | 17                               |
| Carbonic anhydrase 1        | ND                | 9                               | 6                               | 11                               | 14                               |
| Protein 4.1                 | 2                 | 5                               | 7                               | 1                                | 1                                |
| Parasite proteins           |                   |                                 |                                 |                                  |                                  |
| HSP70<br>(PF3D7_0818900)    | 34                | 38                              | 34                              | 35                               | 34                               |
| PV1                         | 23                | 23                              | 24                              | 27                               | 23                               |
| HSP101                      | ND                | 10                              | 16                              | 22                               | 32                               |
| PTEX150                     | ND                | 2                               | 9                               | 7                                | 4                                |
| RESA                        | 2                 | 15                              | 15                              | 8                                | 14                               |
| MESA                        | 2                 | 17                              | 41                              | 11                               | 24                               |
