# Supplementary material for: Exported Epoxide Hydrolases Modulate Erythrocyte Vasoactive Lipids during Plasmodium falciparum Infection
Source: PubMed Central journal article supplement (PMC5082902; doi:10.1128/mbio.01538-16), 2016-10-18
Supplement: mbo005163038st3.pdf [file mbo005163038st3.pdf]

**Supplemental Table 3: Oligonucleotides used in this study.** Restriction sites are underlined, InFusion overhangs are italicized, stop codons are bolded and mutations are in lower case. All oligonucleotides were purchased from Integrated DNA Technologies.

| Oligonucleotide ID                  | Sequence                                                        |
|-------------------------------------|-----------------------------------------------------------------|
| <b>PfEH1/2 into pPM2GT:</b>         |                                                                 |
| NJS1                                | <i>CACTATAGAACTCGAGGATGGT</i> GCTGAAAAGATATG                    |
| NJS2                                | <i>TGTGCTGCACCTGGCCTAGGT</i> GTGGTACATCCATTTTTATC               |
| NJS4                                | <i>CACTATAGAACTCGAGGAATGCCCTTATGAATACGG</i>                     |
| NJS5                                | <i>TGTGCTGCACCTGGCCTAGGT</i> GTTTTATATTGACCATTTTTATC            |
| <b>PfEH1/2 into pEOE and pTEOE:</b> |                                                                 |
| NJS160                              | <i>CGATTTTTCTCGAGATGAAAAAAGGAATGAAGAAATC</i>                    |
| NJS161                              | <i>ATGTGCTGCACCTGGCCTAGGT</i> GTGGTACATCCATTTTTATC              |
| NJS162                              | <i>CGATTTTTCTCGAGATGAGAAATATTAATGGGTTC</i>                      |
| NJS163                              | <i>ATGTGCTGCACCTGGCCTAGGT</i> GTTTTATATTGACCATTTTTATC           |
| NJS299                              | <i>CGATTTTTCTCGAGATGTCAGTTCACGAAAGGATACG</i>                    |
| NJS300                              | <i>ATGTGCTGCACCTGGCCTAGGT</i> TACAAATATATTATTTATCCAGTCAG        |
| NJS301                              | <i>CGATTTTTCTCGAGATGCTCAATTTTAGGAGGTGGAG</i>                    |
| NJS302                              | <i>ATGTGCTGCACCTGGCCTAGGT</i> GGATATATATTATTAAGCC               |
| <b>Mutagenesis of pTEOE_EH1:</b>    |                                                                 |
| NJS524                              | GAGGAAATTAATTAAGATATTTAAGTGA <del>AAAT</del> GAAAAAATGATATATGTG |
| NJS525                              | GAGGAAATTAATTAAGATATTTAAGTGAAGATGCATATGATGGTGTG                 |
| NJS526                              | GAGGAAATTAATTAAGATATTTAAGTGAACACCAAAATTTTTACTGGATAG             |
| NJS527                              | GAGGAAATTAATTAAGATATTTAAGTGAACCTAGGCCAGGTGCAGCACAT              |
| NJS528                              | GAATATAAGGAAAAATGTTACATTAAGTATGAACCTAGGCCAGGTGCAGCACAT          |
| <b>PfEH1/2 into pET28a:</b>         |                                                                 |
| NJS49                               | <i>GTGCCGCGCGGCAGCCATATGACGGAATTAATAAGAGGTC</i>                 |
| NJS50                               | <i>GTGGTGGTGGTGTCTCGAGCTATGTGGTACATCCATTTTTATC</i>              |
| NJS55                               | <i>GTGCCGCGCGGCAGCCATATGGTAATTAAGATGGTATAGG</i>                 |
| NJS56                               | <i>GTGGTGGTGGTGTCTCGAGCTATGTTTTATATTGACCATTTTTATC</i>           |
| NJS219                              | <i>GAAGGAGATATACCATGGGAAGTGAACGGAATTAATAAGAGGTC</i>             |
| NJS220                              | <i>GTGGTGGTGGTGTCTCGAGTGTGGTACATCCATTTTTATC</i>                 |
| NJS221                              | <i>GAAGGAGATATACCATGGGATGTGATGTAATTAAGATGGTATAGG</i>            |
| NJS222                              | <i>GTGGTGGTGGTGTCTCGAGTGTTTTTATATTGACCATTTTTATC</i>             |
| <b>Mutagenesis of pET28a_EH1/2:</b> |                                                                 |
| NJS124                              | GGAATTTTATTTGATTGGTGGTgCAATGGGTTGTTTAATAGCTGC                   |
| NJS 125                             | GCAGCTATTAACAACCCATTGcACCACCAATCAAATAAAATTCC                    |
| NJS 128                             | CCTACTTTAATATTTTGTGGAGAAAAAGcTGATCTTTATGATGACGATG               |
| NJS 129                             | CATCGTCATCATAAAGATCAgCTTTTTCTCCACAAAATATTAAGTAGG                |
| NJS 130                             | CATATTATTGTTTTCAAAGGAGAAAAATgcTTATATAATACCTTCAAGAAC             |
| NJS 131                             | GTTCTTGAAGGTATTATATAAgcATTTTCTCCTTTGAAAACAATAATATG              |
| NJS134                              | GGAACATATGGAATAACAAATGCTGAACTTATTGGAAATAAAGACAAC                |
| NJS 135                             | GTTGTCTTTATTTCCAATAAGTTCAGCATTGTTATTCCATATGTTCC                 |
| NJS170                              | GGAATTTTATTTGATTGGTGGTgatATGGGTTGTTTAATAGCTGC                   |

|                             |                                                  |
|-----------------------------|--------------------------------------------------|
| NJS171                      | GCAGCTATTAACAACCCATatcACCACCAATCAAATAAAATTCC     |
| <b>PfEH1/2 into pUF-TK:</b> |                                                  |
| NJS245                      | <i>CAGGCGCCAGCCTAGGCATATGTTTTGGTTTGTATTG</i>     |
| NJS246                      | <i>ATCGATAACTCCATGGCTTTATCTCCACCAAGCCCATG</i>    |
| NJS247                      | <i>AGATCTTCGGACTAGTGATTGGTGGTTCAATGGGTTG</i>     |
| NJS248                      | <i>CAATGGCCCCTTTCCGCGGGTACATCCATTTTTATCAACAG</i> |
| NJS249                      | <i>CAGGCGCCAGCCTAGGCTTAAGTACATATGATAAAC</i>      |
| NJS250                      | <i>ATCGATAACTCCATGGCTCAGATTCCGGATTCCCCTTC</i>    |
| NJS251                      | <i>AGATCTTCGGACTAGTCATTTGAACCTAGAAAATAAGG</i>    |
| NJS252                      | <i>CAATGGCCCCTTTCCGCGGGTAAACATACATCATTGGGCG</i>  |
| <b>qRT-PCR:</b>             |                                                  |
| EH1_primer1                 | TGGTGGTTCAATGGGTTGT                              |
| EH1_primer2                 | CCTAACATACCCACAGGTGATAAA                         |
| EH1_probe                   | 5' 6-FAM/AGCTGCTGC/ZEN/ATTTGCACAGAAAT/3' IABkFQ  |
| EH2_primer1                 | CACAATCCATACTTGGTTGCATAA                         |
| EH2_primer2                 | CCTCTGAACAATATTCATCATCCTTTC                      |
| EH2_probe                   | 5' 6-FAM/TTTGCATAT/ZEN/GTGGAGTGCTCATCA/3' IABkFQ |
| Actin_primer1               | TGTTGACAACGGATCAGGTAAT                           |
| Actin_primer2               | CCTGGATTCTTTGGTCTTCCTAC                          |
| Actin_probe                 | 5' 6-FAM/AGGAGTTGC/ZEN/AGGAGATGATGCACC/3' IABkFQ |

\
